# Supplementary material
Source: publisher figshare collection journal article supplement (https://karger.figshare.com/articles/dataset/_/14610102)
Supplement: Supplementary file 1 [file 1]

Supplementary Figure S3. Compliance by age category

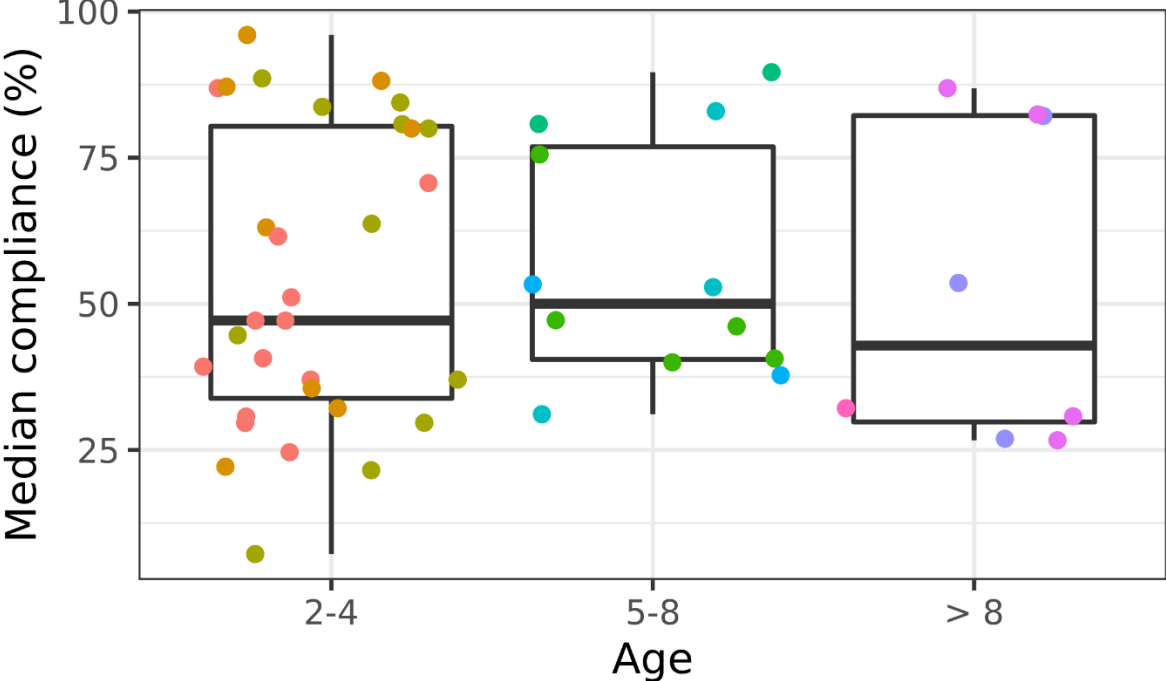

Boxplots of overall compliance by age category. Each dot represents a single subject.
