# Supplementary material
Source: publisher figshare collection journal article supplement (https://karger.figshare.com/articles/dataset/_/14610102)
Supplement: Supplementary file 2 [file 1]

### Supplementary Figure S7. Recovery trajectory sleep duration over time

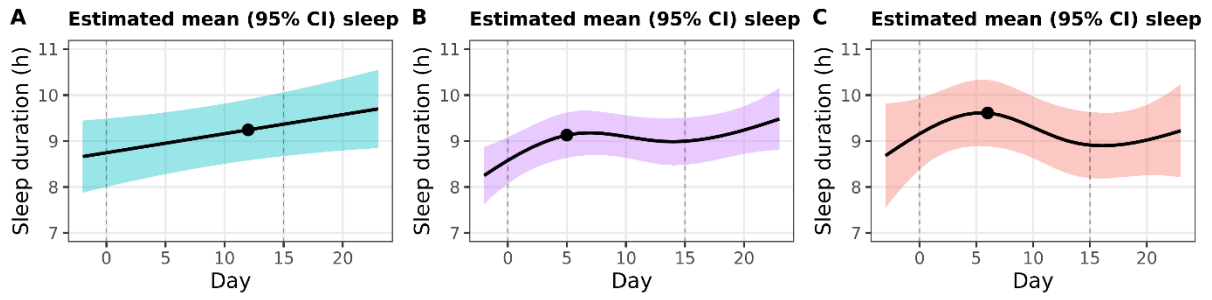

Estimated sleep duration over time for pneumonia patients (left column), preschool wheezing patients (central column) and asthma patients (right column). The black lines indicate the estimated population mean; shaded areas represent the estimated 95% confidence intervals of the mean. The black dots indicate the day where physical activity first reaches 100% of normal levels.
