# Supplementary material
Source: publisher figshare collection journal article supplement (https://karger.figshare.com/articles/dataset/_/14610102)
Supplement: Supplementary file 3 [file 1]

## Supplementary Table S5 – Model Coefficients

### 1. Physical activity

| CAP group                                            | Step count (% of normal level) * |             |        |
|------------------------------------------------------|----------------------------------|-------------|--------|
|                                                      | Predictors                       | Estimates   | CI     |
| (Intercept)                                          | 2.21                             | 1.60 – 2.83 | <0.001 |
| Day [1st degree]                                     | 1.99                             | 1.24 – 2.75 | <0.001 |
| Day [2nd degree]                                     | 0.53                             | 0.14 – 0.93 | 0.009  |
| Wear time (6AM-22PM)                                 | 0.01                             | 0.01 – 0.02 | <0.001 |
| <b>Random Effects</b>                                |                                  |             |        |
| $\sigma^2$                                           | 0.36                             |             |        |
| $\tau_{00}$ SubjectNr                                | 0.13                             |             |        |
| ICC                                                  | 0.26                             |             |        |
| N SubjectNr                                          | 14                               |             |        |
| Observations                                         | 272                              |             |        |
| Marginal R <sup>2</sup> / Conditional R <sup>2</sup> | 0.198 / 0.410                    |             |        |

| PW group                                             | Step count (% of normal level) * |             |        |
|------------------------------------------------------|----------------------------------|-------------|--------|
|                                                      | Predictors                       | Estimates   | CI     |
| (Intercept)                                          | 1.73                             | 1.33 – 2.12 | <0.001 |
| Day [1st degree]                                     | 0.53                             | 0.34 – 0.73 | <0.001 |
| Day [2nd degree]                                     | 2.45                             | 1.86 – 3.05 | <0.001 |
| Day [3rd degree]                                     | 0.45                             | 0.26 – 0.64 | <0.001 |
| Wear time (6AM-22PM)                                 | 0.02                             | 0.01 – 0.02 | <0.001 |
| <b>Random Effects</b>                                |                                  |             |        |
| $\sigma^2$                                           | 0.15                             |             |        |
| $\tau_{00}$ SubjectNr                                | 0.02                             |             |        |
| ICC                                                  | 0.10                             |             |        |
| N SubjectNr                                          | 19                               |             |        |
| Observations                                         | 380                              |             |        |
| Marginal R <sup>2</sup> / Conditional R <sup>2</sup> | 0.382 / 0.446                    |             |        |

| AE group                                             | Step count (% of normal level) * |             |        |
|------------------------------------------------------|----------------------------------|-------------|--------|
|                                                      | Predictors                       | Estimates   | CI     |
| (Intercept)                                          | 2.35                             | 1.62 – 3.08 | <0.001 |
| Day [1st degree]                                     | 0.82                             | 0.51 – 1.13 | <0.001 |
| Day [2nd degree]                                     | 2.63                             | 1.85 – 3.41 | <0.001 |
| Day [3rd degree]                                     | 0.44                             | 0.10 – 0.78 | 0.012  |
| Wear time (6AM-22PM)                                 | 0.01                             | 0.00 – 0.02 | 0.008  |
| <b>Random Effects</b>                                |                                  |             |        |
| $\sigma^2$                                           | 0.17                             |             |        |
| $\tau_{00}$ SubjectNr                                | 0.03                             |             |        |
| ICC                                                  | 0.15                             |             |        |
| N SubjectNr                                          | 6                                |             |        |
| Observations                                         | 124                              |             |        |
| Marginal R <sup>2</sup> / Conditional R <sup>2</sup> | 0.382 / 0.474                    |             |        |

\* log transformation was applied

## 2. Symptom score

| CAP group                                            |               | Symptom score   |        |  |
|------------------------------------------------------|---------------|-----------------|--------|--|
| Predictors                                           | Estimates     | CI              | p      |  |
| (Intercept)                                          | 14.08         | 11.92 – 16.24   | <0.001 |  |
| Day [1st degree]                                     | -21.22        | -25.91 – -16.54 | <0.001 |  |
| Day [2nd degree]                                     | -6.94         | -9.52 – -4.37   | <0.001 |  |
| <b>Random Effects</b>                                |               |                 |        |  |
| $\sigma^2$                                           | 8.80          |                 |        |  |
| $\tau_{00}$ SubjectNr                                | 1.06          |                 |        |  |
| ICC                                                  | 0.11          |                 |        |  |
| N SubjectNr                                          | 13            |                 |        |  |
| Observations                                         | 154           |                 |        |  |
| Marginal R <sup>2</sup> / Conditional R <sup>2</sup> | 0.543 / 0.593 |                 |        |  |

| PW group                                             |            | Symptom score   |        |  |
|------------------------------------------------------|------------|-----------------|--------|--|
| Predictors                                           | Estimates  | CI              | p      |  |
| (Intercept)                                          | 16.22      | 13.86 – 18.59   | <0.001 |  |
| Day [1st degree]                                     | -8.03      | -10.25 – -5.81  | <0.001 |  |
| Day [2nd degree]                                     | -24.79     | -30.05 – -19.54 | <0.001 |  |
| Day [3rd degree]                                     | -5.15      | -7.27 – -3.02   | <0.001 |  |
| <b>Random Effects</b>                                |            |                 |        |  |
| $\sigma^2$                                           | 7.60       |                 |        |  |
| $\tau_{00}$ SubjectNr                                | 4.39       |                 |        |  |
| N SubjectNr                                          | 19         |                 |        |  |
| Observations                                         | 239        |                 |        |  |
| Marginal R <sup>2</sup> / Conditional R <sup>2</sup> | 0.505 / NA |                 |        |  |

| AE group                                             |               | ACD6 score    |        |  |
|------------------------------------------------------|---------------|---------------|--------|--|
| Predictors                                           | Estimates     | CI            | p      |  |
| (Intercept)                                          | 3.79          | 2.80 – 4.78   | <0.001 |  |
| Day [1st degree]                                     | -1.44         | -2.72 – -0.15 | 0.029  |  |
| Day [2nd degree]                                     | -6.02         | -8.33 – -3.71 | <0.001 |  |
| Day [3rd degree]                                     | -1.06         | -2.37 – 0.26  | 0.114  |  |
| <b>Random Effects</b>                                |               |               |        |  |
| $\sigma^2$                                           | 0.79          |               |        |  |
| $\tau_{00}$ SubjectNr                                | 0.05          |               |        |  |
| ICC                                                  | 0.06          |               |        |  |
| N SubjectNr                                          | 6             |               |        |  |
| Observations                                         | 86            |               |        |  |
| Marginal R <sup>2</sup> / Conditional R <sup>2</sup> | 0.380 / 0.414 |               |        |  |

### 3. Heart rate

| CAP group               |           | Daytime heart rate |              |           | Nocturnal heart rate |              |  |
|-------------------------|-----------|--------------------|--------------|-----------|----------------------|--------------|--|
| Predictors              | Estimates | CI                 | p            | Estimates | CI                   | p            |  |
| (Intercept)             | 118.77    | 109.28 – 128.26    | <0.001       | 105.41    | 95.64 – 115.19       | <0.001       |  |
| Day [1st degree]        | -1.63     | -7.81 – 4.55       | 0.603        | -12.39    | -25.00 – 0.22        | 0.054        |  |
| Day [2nd degree]        | 2.15      | -1.04 – 5.34       | 0.185        | -5.10     | -11.54 – 1.33        | 0.120        |  |
| Age                     | -3.23     | -5.46 – -1.01      | <b>0.008</b> | -3.42     | -5.37 – -1.48        | <b>0.002</b> |  |
| <b>Random Effects</b>   |           |                    |              |           |                      |              |  |
| $\sigma^2$              | 33.18     |                    |              | 68.94     |                      |              |  |
| $\tau_{00}$ SubjectNr   | 61.99     |                    |              | 37.63     |                      |              |  |
| N SubjectNr             | 14        |                    |              | 14        |                      |              |  |
| Observations            | 270       |                    |              | 226       |                      |              |  |
| Marginal R <sup>2</sup> | 0.603     |                    |              | 0.482     |                      |              |  |

| PW group                |           | Daytime heart rate |              |           | Nocturnal heart rate |              |  |
|-------------------------|-----------|--------------------|--------------|-----------|----------------------|--------------|--|
| Predictors              | Estimates | CI                 | p            | Estimates | CI                   | p            |  |
| (Intercept)             | 131.74    | 124.26 – 139.22    | <0.001       | 120.72    | 107.53 – 133.92      | <0.001       |  |
| Day [1st degree]        | -9.87     | -13.38 – -6.36     | <0.001       | -8.36     | -14.56 – -2.16       | <b>0.008</b> |  |
| Day [2nd degree]        | -37.28    | -47.19 – -27.37    | <0.001       | -59.06    | -75.10 – -43.02      | <0.001       |  |
| Day [3rd degree]        | -8.41     | -11.87 – -4.95     | <0.001       | -11.90    | -17.85 – -5.96       | <0.001       |  |
| Age                     | -2.29     | -3.97 – -0.60      | <b>0.011</b> | -2.74     | -5.82 – 0.35         | 0.078        |  |
| <b>Random Effects</b>   |           |                    |              |           |                      |              |  |
| $\sigma^2$              | 34.32     |                    |              | 74.10     |                      |              |  |
| $\tau_{00}$ SubjectNr   | 13.19     |                    |              | 44.30     |                      |              |  |
| N SubjectNr             | 18        |                    |              | 18        |                      |              |  |
| Observations            | 337       |                    |              | 303       |                      |              |  |
| Marginal R <sup>2</sup> | 0.386     |                    |              | 0.345     |                      |              |  |

| AE group                |            | Daytime heart rate |        |           | Nocturnal heart rate |              |  |
|-------------------------|------------|--------------------|--------|-----------|----------------------|--------------|--|
| Predictors              | Estimates  | CI                 | p      | Estimates | CI                   | p            |  |
| (Intercept)             | 114.43     | 96.52 – 132.34     | <0.001 | 116.75    | 88.35 – 145.15       | <0.001       |  |
| Day [1st degree]        | -4.74      | -11.46 – 1.97      | 0.165  | -12.38    | -22.57 – -2.20       | <b>0.018</b> |  |
| Day [2nd degree]        | -29.41     | -44.71 – -14.12    | <0.001 | -59.23    | -80.19 – -38.26      | <0.001       |  |
| Day [3rd degree]        | -5.75      | -12.74 – 1.23      | 0.106  | -7.31     | -17.37 – 2.74        | 0.152        |  |
| Age                     | -0.64      | -3.35 – 2.07       | 0.548  | -1.32     | -5.68 – 3.04         | 0.448        |  |
| <b>Random Effects</b>   |            |                    |        |           |                      |              |  |
| $\sigma^2$              | 44.98      |                    |        | 60.35     |                      |              |  |
| $\tau_{00}$ SubjectNr   | 4.49       |                    |        | 10.59     |                      |              |  |
| N SubjectNr             | 6          |                    |        | 6         |                      |              |  |
| Observations            | 124        |                    |        | 112       |                      |              |  |
| Marginal R <sup>2</sup> | 0.192 / NA |                    |        | 0.420     |                      |              |  |
