# Supplementary material
Source: publisher figshare collection journal article supplement (https://karger.figshare.com/articles/dataset/_/14610102)
Supplement: Supplementary file 4 [file 1]

## Supplementary Text S1 – Symptom score questionnaire

### 1. Was your son/daughter today bothered by shortness of breath when

|                               |                                                          |     |
|-------------------------------|----------------------------------------------------------|-----|
| Sitting still                 | <input type="checkbox"/> yes <input type="checkbox"/> no | (1) |
| Walking around the house/ward | <input type="checkbox"/> yes <input type="checkbox"/> no | (1) |
| Washing/dressing              | <input type="checkbox"/> yes <input type="checkbox"/> no | (2) |
| Walking in the street         | <input type="checkbox"/> yes <input type="checkbox"/> no | (2) |
| Playing                       | <input type="checkbox"/> yes <input type="checkbox"/> no | (2) |
| Walking the stairs            | <input type="checkbox"/> yes <input type="checkbox"/> no | (3) |

### 2. If you were to give a mark on a 1 to 5 scale expressing the severity of the shortness of breath at the moment, which mark would that be?

|                                   |                          |     |
|-----------------------------------|--------------------------|-----|
| Not at all short of breath (1)    | <input type="checkbox"/> | (0) |
| Slightly short of breath (2)      | <input type="checkbox"/> | (1) |
| Fairly short of breath (3)        | <input type="checkbox"/> | (1) |
| Substantially short of breath (4) | <input type="checkbox"/> | (2) |
| Terribly short of breath (5)      | <input type="checkbox"/> | (3) |

### 3a. Does your son/daughter cough?

|                                      |                          |     |
|--------------------------------------|--------------------------|-----|
| No (skip questions 3b, c and d)      | <input type="checkbox"/> | (0) |
| Only in the morning, when getting up | <input type="checkbox"/> | (1) |
| Now and then, all through the day    | <input type="checkbox"/> | (2) |
| Frequently, all through the day      | <input type="checkbox"/> | (3) |

### 3b. Does he/she cough up sputum?

|          |                          |     |
|----------|--------------------------|-----|
| None     | <input type="checkbox"/> | (0) |
| A little | <input type="checkbox"/> | (1) |
| A lot    | <input type="checkbox"/> | (2) |

### 3c. Does he/she cough up the sputum with ease?

|                        |                          |     |
|------------------------|--------------------------|-----|
| Not bothered by sputum | <input type="checkbox"/> | (0) |
| With ease              | <input type="checkbox"/> | (1) |
| Fairly difficult       | <input type="checkbox"/> | (1) |
| Very difficult         | <input type="checkbox"/> | (2) |

### 3d. What is the color of the sputum?

|                                 |                          |     |
|---------------------------------|--------------------------|-----|
| Did not pay attention/no sputum | <input type="checkbox"/> | (0) |
| Transparent                     | <input type="checkbox"/> | (0) |
| White                           | <input type="checkbox"/> | (1) |
| Green, yellow or brown          | <input type="checkbox"/> | (1) |

### 4. My child is

|                  |                                                                                                                              |                |             |
|------------------|------------------------------------------------------------------------------------------------------------------------------|----------------|-------------|
| Not fit          | <input type="checkbox"/> <input type="checkbox"/> <input type="checkbox"/> <input type="checkbox"/> <input type="checkbox"/> | Fit            | (0,1,2,3,3) |
| Not him/her self | <input type="checkbox"/> <input type="checkbox"/> <input type="checkbox"/> <input type="checkbox"/> <input type="checkbox"/> | Him/her self   | (0,1,2,3,3) |
| Tired quickly    | <input type="checkbox"/> <input type="checkbox"/> <input type="checkbox"/> <input type="checkbox"/> <input type="checkbox"/> | Full of energy | (0,1,2,3,3) |
