# Supplementary material
Source: publisher figshare collection journal article supplement (https://karger.figshare.com/articles/dataset/_/14610102)
Supplement: Supplementary file 5 [file 1]

**Supplementary Figure S8. Monitoring device measurements of an AE subject**

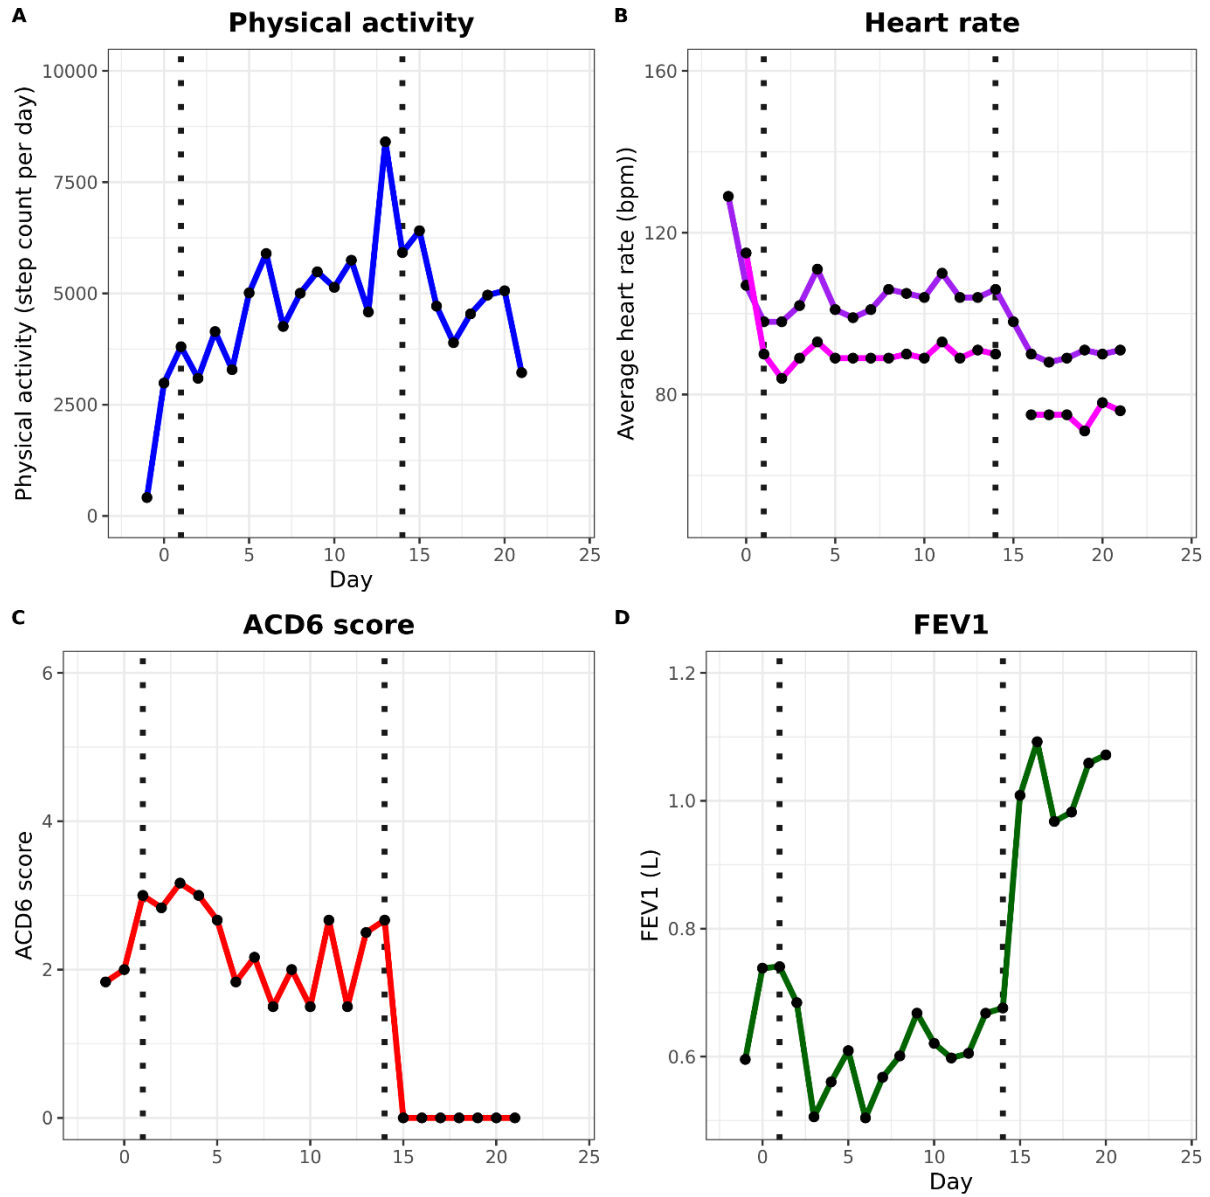

Raw data of single subject in the asthma exacerbation group. A: physical activity over time. B: daytime heart rate (purple line) and nocturnal heart rate (pink line) over time. C: Symptom score over time. D: FEV1 over time. The data before the left vertical dotted lines indicate the admission period, the data in between both dotted lines indicate the recovery period and the data after the right dotted lines indicate the healthy period.
