# Supplementary material
Source: publisher figshare collection journal article supplement (https://karger.figshare.com/articles/dataset/_/14610102)
Supplement: Supplementary file 7 [file 1]

Archive with 8 entries (8 files):
- Supplementary material-Supplementary_Figure_S2.pdf
- Supplementary material-Supplementary_Figure_S3.pdf
- Supplementary material-Supplementary_Figure_S4.pdf
- Supplementary material-Supplementary_Figure_S6.pdf
- Supplementary material-Supplementary_Figure_S7.pdf
- Supplementary material-Supplementary_Figure_S8.pdf
- Supplementary material-Supplementary_Table_S5.pdf
- Supplementary material-Supplementary_Text_S1.pdf
