# Supplementary material
Source: publisher figshare collection journal article supplement (https://karger.figshare.com/articles/dataset/_/14610102)
Supplement: Supplementary file 7 [file 1 › Supplementary material-Supplementary_Figure_S2.pdf]

## Supplementary Figure S2. Individual summary plots of physical activity

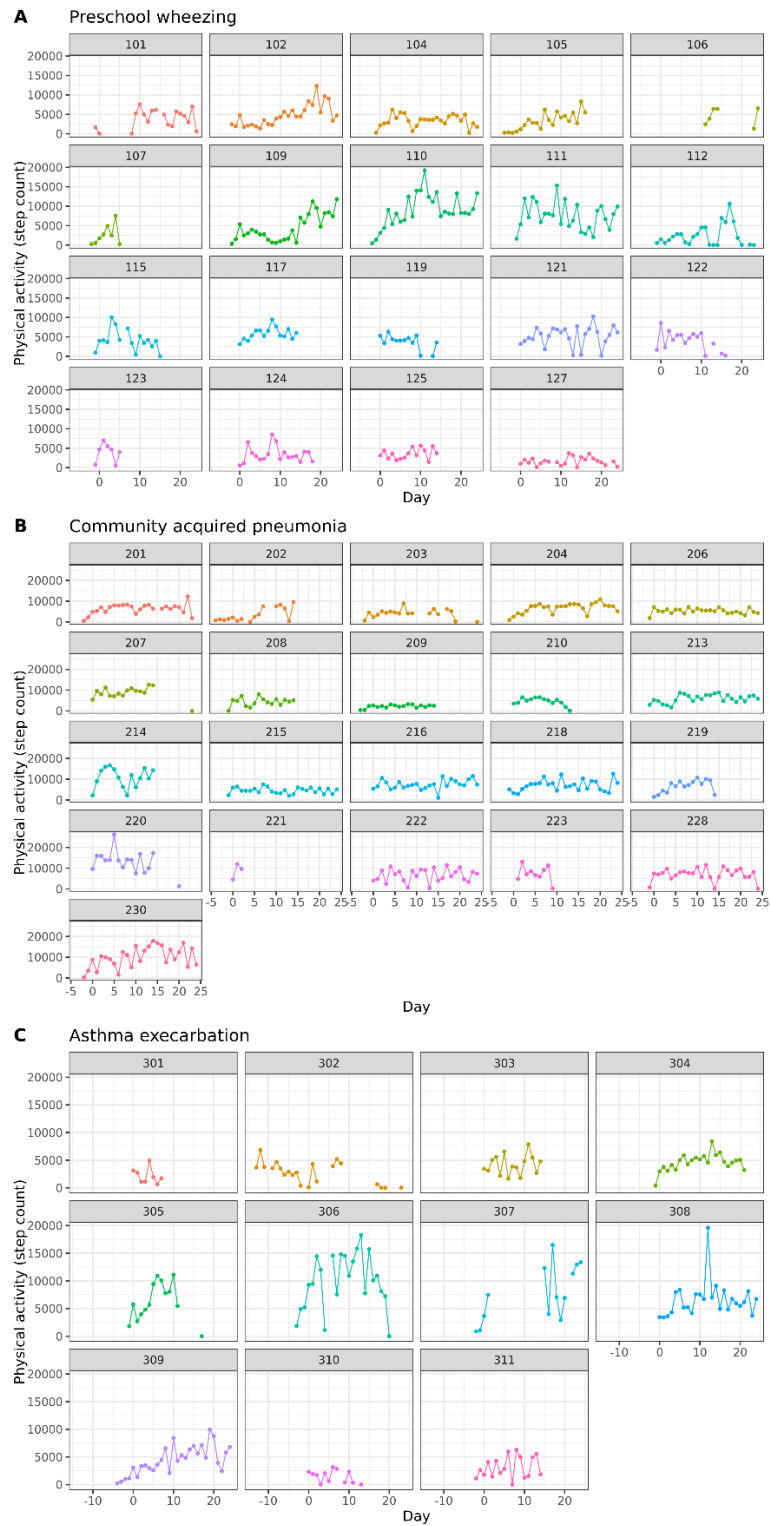

Each plot displays data of an individual subject. All plots show the physical activity (step count) during the entire study period, which was not adjusted for watch wear time.
