# Supplementary material
Source: publisher figshare collection journal article supplement (https://karger.figshare.com/articles/dataset/_/14610102)
Supplement: Supplementary file 7 [file 1 › Supplementary material-Supplementary_Figure_S4.pdf]

**Supplementary Figure S4. Raw data (mean (SD)) of physical activity, heart rate and symptom score data per group**

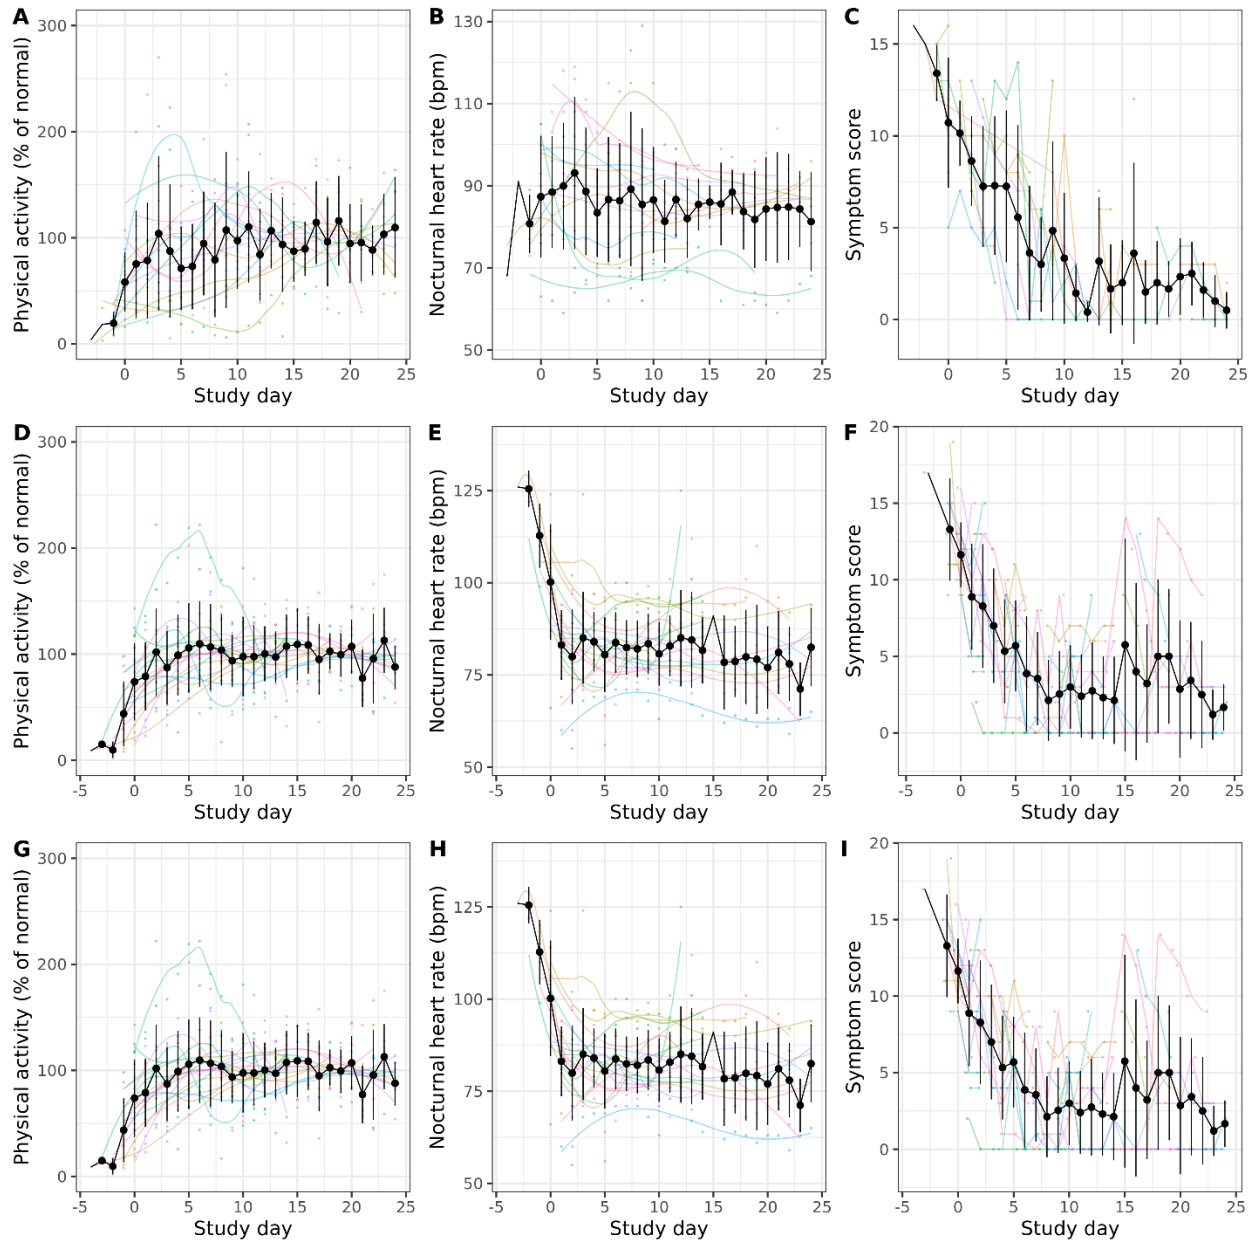

Raw data of physical activity (left column), heart rate (central column) and symptom score (right column) data for the CAP group (A-C), PW group (D-F) and asthma exacerbation group (G-I). Bold dots and lines represent the mean (SD) of the raw data per study day. Colored dots and lines represent individual observations and subjects, respectively. The mean (SD) data is not adjusted for repeated measurements per subject or partial noncompliance during the day. Therefore, the model-estimated means presented in the main manuscript are expected to be more valid.
